# Supplementary material for: Functional Comparison between Healthy and Multiple Myeloma Adipose Stromal Cells
Source: Hindawi journal article supplement (doi:10.1155/2020/4173578), 2020-03-05
Supplement: f1 [file 4173578.f1.pdf]

| hgnc_symbol | FC         | adj,P,Val   |
|-------------|------------|-------------|
| ZIC1        | 29,9468358 | 3,25E-12    |
| ZIC1        | 8,92976686 | 1,24E-10    |
| SCARA5      | 7,11830135 | 0,020981361 |
| CHI3L1      | 6,94684579 | 0,021848595 |
| STEAP4      | 6,33465325 | 0,005135315 |
| IGDCC4      | 5,36836205 | 3,60E-05    |
| LINC01139   | 5,12654792 | 7,63E-07    |
| COL21A1     | 4,93443113 | 0,003778994 |
| SCARA5      | 4,92217859 | 0,031808641 |
| CHI3L1      | 4,91784554 | 0,04068759  |
| CCRL1P1     | 4,91513289 | 0,001456342 |
| ACKR4       | 4,91513289 | 0,001456342 |
| PLA2G2A     | 4,75508688 | 0,02557513  |
| RIPOR3      | 4,6855866  | 0,007002547 |
| H19         | 4,57852555 | 0,035905081 |
| TNFSF10     | 4,53739769 | 0,0359134   |
| CPXM1       | 4,49901016 | 0,018033398 |
| TNFSF10     | 4,36386792 | 0,014822794 |
| COLEC12     | 4,24269347 | 0,02225264  |
| SLC39A8     | 4,22289354 | 0,009500521 |
| OGN         | 4,21387642 | 0,020801429 |
| EXOSC7      | 4,13166809 | 0,030382113 |
| CLEC3B      | 4,13166809 | 0,030382113 |
| CXCL6       | 4,12577862 | 0,029279699 |
| TNFSF10     | 4,06467643 | 0,008737424 |
| SHOX2       | 3,93081951 | 0,002569507 |
| SIM1        | 3,87370239 | 0,002265585 |
| C1S         | 3,87267942 | 0,035905081 |
| CLU         | 3,76726118 | 0,03794651  |
| CDON        | 3,7609255  | 0,005012894 |
| PLAU        | 3,70709775 | 0,006311287 |
| FMO1        | 3,66586676 | 0,012738187 |
| SLC39A8     | 3,59875535 | 0,010921568 |
| MEOX2       | 3,49460728 | 0,006276374 |
| ZIC1        | 3,46516773 | 2,94E-05    |
| LSAMP       | 3,43569361 | 0,005135315 |
| ADAMTS5     | 3,35239437 | 0,008638262 |
| PDGFD       | 3,34582668 | 0,003778994 |
| OLFML2A     | 3,3274322  | 0,003167173 |
| TSHZ2       | 3,31898226 | 0,003778994 |
| LRRN4CL     | 3,31855994 | 0,037066434 |
| OGN         | 3,30133978 | 0,020065962 |
| TGFBR3      | 3,26606175 | 0,003167173 |
| PTGFR       | 3,16884863 | 0,013101053 |
| PDE1A       | 3,15603823 | 0,003778994 |
| FGL2        | 3,1270578  | 0,028698184 |
| PDE1A       | 3,11255562 | 0,00147887  |
| PLAU        | 3,09331401 | 0,020666244 |
| FBLN1       | 3,08019008 | 0,039145159 |

**Fig.S1**

|           |            |             |
|-----------|------------|-------------|
| AKAP12    | 3,07938853 | 0,009227265 |
| PCOLCE2   | 3,03848049 | 0,001191464 |
| CXCL1     | 3,02194545 | 0,037580921 |
| PDE1A     | 2,98737778 | 0,003167173 |
| APOD      | 2,93341115 | 0,044354921 |
| PDGFRL    | 2,89694047 | 0,023081694 |
| LINC02511 | 2,87912423 | 0,030134614 |
| LRIG3     | 2,87880305 | 0,005361796 |
| CYP7B1    | 2,86826076 | 0,010167695 |
| TMEM30B   | 2,8672913  | 0,000567164 |
| PDE1A     | 2,85720646 | 0,005361796 |
| CHRD1     | 2,84047878 | 0,049550944 |
| SIM1      | 2,84020958 | 0,001191464 |
| MAF       | 2,83298878 | 0,02557513  |
| TGFBR3    | 2,82437111 | 0,007002547 |
| STEAP4    | 2,81342211 | 0,007605967 |
| GIPC2     | 2,80066219 | 0,003167173 |
| TSHZ2     | 2,78706681 | 0,008012402 |
| GPR39     | 2,76243631 | 0,008389791 |
| SRPX      | 2,76147595 | 0,013437555 |
| OMD       | 2,75616592 | 0,017806793 |
| SNED1     | 2,74573847 | 0,044846817 |
| SHOX2     | 2,73276018 | 0,006499649 |
| SOD2      | 2,71612177 | 0,019583992 |
| PDE1A     | 2,71578524 | 0,006276374 |
| DCLK1     | 2,7000751  | 0,029279699 |
| DCLK1     | 2,69412582 | 0,024354186 |
| PTPRD-AS1 | 2,692947   | 0,020682839 |
| KCNJ15    | 2,68645224 | 0,016043971 |
| XPNPEP2   | 2,68189186 | 0,039753468 |
| ZEB1      | 2,67167599 | 0,004686967 |
| RASD1     | 2,65038986 | 0,036460868 |
| RIPOR2    | 2,64684554 | 0,005713996 |
| DCLK1     | 2,64643802 | 0,026654113 |
| ETV1      | 2,64367797 | 0,049096849 |
| CXCL12    | 2,64180156 | 0,010921568 |
| PTPRD     | 2,63939735 | 0,030134614 |
| S100A4    | 2,63923403 | 0,010665507 |
| CREB5     | 2,63794464 | 0,002265585 |
| PTGER3    | 2,6346815  | 0,015395119 |
| PTPRD     | 2,61222751 | 0,037772848 |
| HOTAIR    | 2,60464407 | 0,002265585 |
| ADAMTS5   | 2,58881096 | 0,015938008 |
| FGL2      | 2,57941057 | 0,044250747 |
| SCARA3    | 2,56505335 | 0,009009044 |
| IL17RD    | 2,56319115 | 0,030382113 |
| PDGFD     | 2,53034046 | 0,008166513 |
| SOD2      | 2,52076144 | 0,030382113 |
| NT5E      | 2,51956559 | 0,003573357 |
| TRH       | 2,51210289 | 0,04149936  |

|             |            |             |
|-------------|------------|-------------|
| CXCL12      | 2,49744978 | 0,013457542 |
| ADAMTS5     | 2,49720436 | 0,015909903 |
| STEAP4      | 2,47578278 | 0,020330717 |
| ADAMTS15    | 2,47297299 | 0,036460868 |
| BTN3A3      | 2,47185758 | 0,011547111 |
| CREB5       | 2,46669232 | 0,003778994 |
| TJP2        | 2,44975823 | 0,008442413 |
| 202085_at   | 2,44975823 | 0,008442413 |
| IL6ST       | 2,44279272 | 0,026170493 |
| LSP1        | 2,44253009 | 0,018877608 |
| TSHZ2       | 2,4287565  | 0,037580921 |
| AKAP12      | 2,40880848 | 0,015909903 |
| NCALD       | 2,39695004 | 0,005361796 |
| KLF3        | 2,37892173 | 0,010665507 |
| ZNF521      | 2,37759216 | 0,04478322  |
| EPB41L3     | 2,36978285 | 0,04478322  |
| IL1R1       | 2,36223913 | 0,012960391 |
| TMEM35A     | 2,36057061 | 0,012960391 |
| TRERF1      | 2,35932916 | 0,008638262 |
| PDE7B       | 2,3485274  | 0,006647412 |
| DENND2A     | 2,33322298 | 0,006647412 |
| CCL8        | 2,3267133  | 0,023098928 |
| FAM20A      | 2,31404049 | 0,024270135 |
| MAFB        | 2,31001803 | 0,045005851 |
| SULF2       | 2,2875399  | 0,031426752 |
| SCARA3      | 2,27496611 | 0,015395119 |
| DNM1        | 2,26339916 | 0,046931852 |
| FGF18       | 2,26239051 | 0,04478322  |
| TSHZ2       | 2,2605117  | 0,024270135 |
| GREM2       | 2,25916986 | 0,047979011 |
| SOCS3       | 2,23867341 | 0,026214035 |
| DCLK1       | 2,23544077 | 0,04149936  |
| ARHGEF3     | 2,22657071 | 0,024354186 |
| KCND2       | 2,22544138 | 0,024221152 |
| LGR4        | 2,2221427  | 0,006647412 |
| ZNF436      | 2,20924198 | 0,015395119 |
| FAM20A      | 2,20588627 | 0,037580921 |
| SULF2       | 2,1997055  | 0,044354921 |
| GUCY1A2     | 2,19812413 | 0,044354921 |
| MCC         | 2,19286783 | 0,015395119 |
| TNXA        | 2,18779922 | 0,044354921 |
| TNXB        | 2,18779922 | 0,044354921 |
| GFRA1       | 2,18143382 | 0,010004198 |
| PMAIP1      | 2,17769313 | 0,030382113 |
| AKAP12      | 2,17729182 | 0,026380453 |
| ZFP36L2     | 2,17501764 | 0,031426752 |
| PRRX1       | 2,1718123  | 0,021848595 |
| 215223_s_at | 2,16867338 | 0,047402599 |
| SOD2        | 2,16867338 | 0,047402599 |
| SLC2A5      | 2,16242772 | 0,016785421 |

|             |            |             |
|-------------|------------|-------------|
| TCEAL7      | 2,15790641 | 0,03828766  |
| FAM3C       | 2,1539948  | 0,006702    |
| CPZ         | 2,15035423 | 0,047807622 |
| GPR78       | 2,15035423 | 0,047807622 |
| GASK1B      | 2,14279972 | 0,017510044 |
| AXIN2       | 2,14234333 | 0,009009044 |
| AHNAK2      | 2,13932703 | 0,0238667   |
| CAMK2N1     | 2,13701388 | 0,040507605 |
| ZFH4-AS1    | 2,13642818 | 0,013101053 |
| ELFN1       | 2,13446961 | 0,012960391 |
| EBF2        | 2,13004332 | 0,03828766  |
| PTGFR       | 2,12720921 | 0,018855648 |
| ZNF385D     | 2,12495506 | 0,025760319 |
| DENND2A     | 2,11410053 | 0,013976681 |
| C1RL        | 2,11348601 | 0,035320026 |
| BTN3A2      | 2,11345066 | 0,011856422 |
| RASSF2      | 2,10126655 | 0,015909903 |
| ADAMTS5     | 2,09876171 | 0,046157453 |
| C17orf58    | 2,07834809 | 0,029094357 |
| SLC9A9      | 2,07502055 | 0,013498642 |
| C10orf90    | 2,07402643 | 0,02225264  |
| CD44        | 2,06617832 | 0,017795471 |
| OMD         | 2,06441217 | 0,04679665  |
| COL8A2      | 2,05551112 | 0,013101053 |
| IL6ST       | 2,05153127 | 0,037580921 |
| CHURC1      | 2,05074248 | 0,045827101 |
| ELOVL2      | 2,04452527 | 0,02058644  |
| GIPC2       | 2,04139666 | 0,030382113 |
| SAMHD1      | 2,03848245 | 0,03037556  |
| PMAIP1      | 2,03235496 | 0,022637296 |
| CARD10      | 2,03090126 | 0,035248773 |
| MYO1D       | 2,02969717 | 0,026170493 |
| KCNK2       | 2,02676894 | 0,012960391 |
| PTGER3      | 2,02660094 | 0,037580921 |
| SOCS3       | 2,01017884 | 0,045005851 |
| KCTD12      | 2,00983296 | 0,047979011 |
| EML1        | 2,00185849 | 0,013498642 |
| ZNF436      | 2,00059984 | 0,04348027  |
| ANKRD33B    | 2,000044   | 0,030367087 |
| ARHGAP6     | 1,99860169 | 0,038620226 |
| HRH1        | 1,98991737 | 0,026380453 |
| ANK2        | 1,98584407 | 0,047979011 |
| LSAMP       | 1,98580279 | 0,033326704 |
| IL6ST       | 1,98421127 | 0,026380453 |
| SELENBP1    | 1,97398882 | 0,047599154 |
| MAN1A1      | 1,96975609 | 0,01779173  |
| 209355_s_at | 1,96007794 | 0,03828766  |
| PLPP3       | 1,96007794 | 0,03828766  |
| SFR1        | 1,95641279 | 0,044250747 |
| SLC44A1     | 1,95177347 | 0,015395119 |

|           |            |             |
|-----------|------------|-------------|
| VSTM4     | 1,94692793 | 0,012960391 |
| CTSLP8    | 1,94376034 | 0,020330717 |
| RUBCNL    | 1,94144834 | 0,029684154 |
| STMN3     | 1,93473206 | 0,044250747 |
| ERG       | 1,93279202 | 0,046157453 |
| EBF1      | 1,92844131 | 0,021111024 |
| GAS1      | 1,92649274 | 0,018855648 |
| GCLM      | 1,91482895 | 0,03909725  |
| BTN3A3    | 1,91346455 | 0,03828766  |
| TSHZ2     | 1,90796903 | 0,029501573 |
| RRAD      | 1,90638153 | 0,044354921 |
| PROCR     | 1,90343219 | 0,026380453 |
| ACE       | 1,90019294 | 0,049997428 |
| SECTM1    | 1,89988517 | 0,04149936  |
| ADCY3     | 1,89603259 | 0,045005851 |
| KLF4      | 1,89163252 | 0,04149936  |
| APOL3     | 1,8835642  | 0,039050336 |
| MAN1A1    | 1,88253803 | 0,046149416 |
| CA12      | 1,88020179 | 0,040316404 |
| ZFP36L2   | 1,87910478 | 0,018253442 |
| PDE1A     | 1,8774423  | 0,030382113 |
| PRRX1     | 1,87297874 | 0,033470488 |
| EML1      | 1,87290716 | 0,023081694 |
| PROS1     | 1,87235679 | 0,03828766  |
| GALNT16   | 1,86087921 | 0,033808209 |
| IL1R1     | 1,84994768 | 0,049649966 |
| RSRC1     | 1,84965909 | 0,032115746 |
| DIRC3     | 1,8494934  | 0,046653228 |
| GLI3      | 1,84847509 | 0,030382113 |
| CD44      | 1,84640355 | 0,037231257 |
| CDC14B    | 1,83781918 | 0,022637296 |
| JAK1      | 1,8239494  | 0,04149936  |
| SMURF2    | 1,8160758  | 0,04348027  |
| CD44      | 1,81535073 | 0,035248773 |
| CD47      | 1,80443532 | 0,029410538 |
| IL6ST     | 1,79909937 | 0,028698184 |
| RNASE4    | 1,78062866 | 0,046366154 |
| 205158_at | 1,78062866 | 0,046366154 |
| ANG       | 1,78062866 | 0,046366154 |
| IRAK3     | 1,77631641 | 0,04348027  |
| SMKR1     | 1,77539049 | 0,040111659 |
| REV3L     | 1,76964273 | 0,04149936  |
| CD44      | 1,76648816 | 0,030367087 |
| PTPRG     | 1,75989493 | 0,033719309 |
| PRRX1     | 1,75775559 | 0,04348027  |
| RAC1      | 1,75103171 | 0,046653228 |
| SLC44A1   | 1,7260569  | 0,036460868 |
| ZCCHC24   | 1,72276033 | 0,030382113 |
| ARHGAP24  | 1,71515717 | 0,030382113 |
| KCNJ18    | 1,69694346 | 0,045005851 |

KCNJ12

1,69694346 0,045005851
